# Supplementary material for: More than Enzymes That Make or Break Cyclic Di-GMP—Local Signaling in the Interactome of GGDEF/EAL Domain Proteins of Escherichia coli
Source: PubMed Central journal article supplement (PMC5635695; doi:10.1128/mbio.01639-17), 2017-10-10
Supplement: mbo005173526st1.pdf [file mbo005173526st1.pdf]

## Supporting S1 Table

### Oligonucleotide primers used in the present study<sup>1</sup>.

#### I. Primers used for cloning cytoplasmic parts of all GGDEF, EAL and degenerate GGDEF/EAL domain proteins as well as GGDEF domains alone into pBT and pTRG:

|                             |                                               |
|-----------------------------|-----------------------------------------------|
| <i>dgcC</i> -pBT-EcoRI-for  | 5`-GCCGAATTCCTGGCGGAACATAAACGCAGG-3`          |
| <i>dgcC</i> -BglII-rev      | 5`-GCCAGATCTTCAGGCCGCACTTCGGTGC-3`            |
| <i>dgcC</i> -pTRG-EcoRI-for | 5`-GCCGAATTCCTGGCGGAACATAAACGCAGG-3`          |
| <i>dgcE</i> -pTRG-EcoRI-for | 5`-GCCGAATTCCTGAGCTAAAACGCACCGAACAGG-3`       |
| <i>dgcE</i> -XhoI-rev       | 5`-GCCCTCGAGTCAGTTAATCGCGAAATAACTAC-3`        |
| <i>dgcF</i> -pBT-EcoRI-for  | 5`-GCCGAATTCCTAATGAAGCAAGTTGCGCTG-3`          |
| <i>dgcF</i> -XhoI-rev       | 5`-GCCCTCGAGTCAGACAACCTCCTCACCG-3`            |
| <i>dgcF</i> -pTRG-EcoRI-for | 5`-GCCGAATTCCTAATGAAGCAAGTTGCGCTG-3`          |
| <i>dgcI</i> -pBT-EcoRI-for  | 5`-GCCGAATTCCTGTGATTAATCGTGGTATTGTG-3`        |
| <i>dgcI</i> -XhoI-rev       | 5`-GCCCTCGAGTTACTGCCAGCTAATCTGTGC-3`          |
| <i>dgcI</i> -pTRG-EcoRI-for | 5`-GCCGAATTCCTGTGATTAATCGTGGTATTGTG-3`        |
| <i>dgcJ</i> -NotI-for       | 5`-GAAGCGGCCGCTCGGATGCACTCCGTTTATACC-3`       |
| <i>dgcJ</i> -XhoI-rev       | 5`-GCCCTCGAGTCATGAACGGCTGTTTTTGTCTGC-3`       |
| <i>dgcN</i> -NotI-for       | 5`-GAAGCGGCCGCTCACAATGGCCTGGTAGAAGCG-3`       |
| <i>dgcN</i> -XhoI-rev       | 5`-GCCCTCGAGTTATCTCACCAGCTTTTCGGC-3`          |
| <i>dgcO</i> -NotI-for       | 5`-GAAGCGGCCGCTGAGATGTATTTTAAAAGAATG-3`       |
| <i>dgcO</i> -XhoI-rev       | 5`-GCCCTCGAGCTAAAGACTGGCTTTCCAGAG-3`          |
| <i>dgcP</i> -pBT-EcoRI-for  | 5`-GCCGAATTCCTCAGATCAGATTATCGCC-3`            |
| <i>dgcP</i> -XhoI-rev       | 5`-GCCCTCGAGTCAGGAATGTAGCGCTGG-3`             |
| <i>dgcP</i> -pTRG-EcoRI-for | 5`-GCCGAATTCCTTCAGATCAGATTATCGCC-3`           |
| <i>dgcQ</i> -pBT-EcoRI-for  | 5`-GCCGAATTCCTGTTAGCAACATGTATGTTCTG-3`        |
| <i>dgcQ</i> -XhoI-rev       | 5`-GCCCTCGAGTTAAGCGTTATCGCTCGGAATACC-3`       |
| <i>dgcQ</i> -pTRG-EcoRI-for | 5`-GCCGAATTCCTGTTAGCAACATGTATGTTCTG-3`        |
| <i>dgcT</i> -pBT-EcoRI-for  | 5`-GCCGAATTCCTAAGAACATTGCACATCGCGATCCC-3`     |
| <i>dgcT</i> -XhoI-rev       | 5`-GCCCTCGAGTTATGGTGACTCACAAAATTACCC-3`       |
| <i>dgcT</i> -pTRG-EcoRI-for | 5`-GCCGAATTCCTAAGAACATTGCACATCGCGATCCC-3`     |
| <i>dgcZ</i> -pBT-EcoRI-for  | 5`-GCCGAATTCCTATCAAGAAGACAACGGAAATTG-3`       |
| <i>dgcZ</i> -XhoI-rev       | 5`-GCCCTCGAGTTAAACTCGGTTAATCACATTTG-3`        |
| <i>dgcZ</i> -pTRG-EcoRI-for | 5`-GCCGAATTCCTATCAAGAAGACAACGGAAATTG-3`       |
| <i>pdeA</i> -pBT-EcoRI-for  | 5`-GCCGAATTCACATCGCAGTGAATGGCTTAATCGC-3`      |
| <i>pdeA</i> -XhoI-rev       | 5`-GCCCTCGAGTTAATCAGCTAATGGCTGCGGGCG-3`       |
| <i>pdeA</i> -pTRG-EcoRI-for | 5`-GCCGAATTCACATCGCAGTGAATGGCTTAATCGC-3`      |
| <i>pdeB</i> -pBT-EcoRI-for  | 5`-GCCGAATTCACGCCGTATTCAGTCACCGCATC-3`        |
| <i>pdeB</i> -XhoI-rev       | 5`-GCCCTCGAGTCACAAATGTTGCTCGGCCAGCG-3`        |
| <i>pdeB</i> -pTRG-EcoRI-for | 5`-GCCGAATTCACGCCGTATTCAGTCACCGCATC-3`        |
| <i>pdeC</i> -pBT-EcoRI-for  | 5`-GCCGAATTCACACTACGTATTCGACAAAATTTATCTCCC-3` |
| <i>pdeC</i> -XhoI-rev       | 5`-GCCCTCGAGTTATTGCCCGCGGTTAACTCCCG-3`        |

<sup>1</sup> Relevant nucleotides (e.g. restriction sites, mutations introduced or pKD45-specific sequences) labeled in **bold**. All primer sequences are given from 5`- to 3`-end.

|                                   |                                                    |
|-----------------------------------|----------------------------------------------------|
| <i>pdeC</i> -pTRG-EcoRI-for       | 5`-GCCGAATTCCTACTACGTATTTCGACAAAACCTATTTATCTCCC-3` |
| <i>pdeD</i> -pBT-EcoRI-for        | 5`-GCCGAATTCGCGCTGGCTGGCGACCGCTTACCG-3`            |
| <i>pdeD</i> -XhoI-rev             | 5`-GCCCTCGAGTTAACGTAACGGCATAATGGG-3`               |
| <i>pdeD</i> -pTRG-EcoRI-for       | 5`-GCCGAATTCAGGCCTGGCTGGCGACCGCTTACCG-3`           |
| <i>pdeF</i> -pBT-EcoRI-for        | 5`-GCCGAATTCACGTCAGAGAGCGGTAGTCAGACGC-3`           |
| <i>pdeF</i> -pBT-XhoI-rev         | 5`-GCCCTCGAGTCAGGCACTTTCGCGAATGGG-3`               |
| <i>pdeF</i> -pTRG-EcoRI-for       | 5`-GCCGAATTC AACGTCAGAGAGCGGTAGTCAGACGC-3`         |
| <i>pdeG</i> -NotI-for             | 5`-GAAGCGGCCGCAGATAGATATTTCAATAAAAAGC-3`           |
| <i>pdeG</i> -XhoI-rev             | 5`-GCCCTCGAGTCACTCAACCACAACCTTACC-3`               |
| <i>pdeI</i> -NotI-for             | 5`-GAAGCGGCCGCTCGCTGGCGTTTTTGCCTGACTCAACGG-3`      |
| <i>pdeI</i> -XhoI-rev             | 5`-GCCCTCGAGTACTCTTTTACTAATTTCC-3`                 |
| <i>pdeK</i> -pBT-EcoRI-for        | 5`-GCCGAATTCGCGCATCCCAGCCAAGGAGCTTGTGG-3`          |
| <i>pdeK</i> -XhoI-rev             | 5`-GCCCTCGAGTACTTTTCTCCAGGTA-3`                    |
| <i>pdeK</i> -pTRG-EcoRI-for       | 5`GCCGAATTCAGGCCATCCCAGCCAAGGAGCTTGTGG-3`          |
| <i>pdeL</i> -NotI-for             | 5`-GAAGCGGCCGCAAATTCATGTGATTTTCGTG-3`              |
| <i>pdeL</i> -SpeI-rev             | 5`-CCGACTAGTCTATCAACCACCTGCTTTCATTA-3`             |
| <i>pdeN</i> -pBT-EcoRI-for        | 5`-GCCGAATTCCTAGCGTACGTATGCGCCCCGGC-3`             |
| <i>pdeN</i> -XhoI-rev             | 5`-GCCCTCGAGTTACCACTGCGGCGTATACGG-3`               |
| <i>pdeN</i> -pTRG-EcoRI-for       | 5`-GCCGAATTC CAAGCGTACGTATGCGCCCCGGC-3`            |
| <i>pdeO</i> -NotI-for             | 5`-GAAGCGGCCGCAAAGCTAACCGATGCGGATAATGCC-3`         |
| <i>pdeO</i> -XhoI-rev             | 5`-GCCCTCGAGTCAGATTTTCAGCGGTAACACGC-3`             |
| <i>cdgI</i> -pBT-EcoRI-for        | 5`-GCCGAATTCACAGGAGCTGCAACTCTCCAGC-3`              |
| <i>cdgI</i> -XhoI-rev             | 5`-GCCCTCGAGTTAAATATGATGAATAATCAC-3`               |
| <i>cdgI</i> -pTRG-EcoRI-for       | 5`-GCCGAATTC AACAGGAGCTGCAACTCTCCAGC-3`            |
| <i>csrD</i> -pBT-EcoRI-for        | 5`-GCCGAATTC ACTGGCGGTACGCTGGTTACAACGC-3`          |
| <i>csrD</i> -pBT-XhoI-rev         | 5`-GCCCTCGAGTTAAACCGAGTATCTTTGTG-3`                |
| <i>csrD</i> -pTRG-EcoRI-for       | 5`-GCCGAATTC AACTGGCGGTACGCTGGTTACAACGC-3`         |
| <i>rflP</i> -pBT-EcoRI-for        | 5`-GCCGAATTC AAAGATTTTTTTGGAGAAT-3`                |
| <i>rflP</i> -XhoI-rev             | 5`-GCCCTCGAGTTATCGCTGAACCAACGTCG-3`                |
| <i>rflP</i> -pTRG-EcoRI-for       | 5`-GCCGAATTC AAAAGATTTTTTTGGAGAAT-3`               |
| <i>dgcE</i> -3xPAS-XhoI-rev       | 5`-GCTACTCGAGTTACAGCAGGATACGTTCTG-3`               |
| <i>dgcE</i> -GGDEF-pTRG-EcoRI-for | 5`-GTACGAATTC CCTCACGCAAAATGCTGCGCCAG-3`           |
| <i>dgcE</i> -GGDEF-XhoI-rev       | 5`-GCTACTCGAGATCAAGCGACATCGCCGC-3`                 |
| <i>dgcE</i> -EAL-pBT-EcoRI-for    | 5`-GCCGAATTCAGTTTACGAACCGCAGCAAGC-3`               |
| <i>dgcE</i> -EAL-pTRG-EcoRI-for   | 5`-GCCGAATTC AAGTTTACGAACCGCAGCAAGC-3`             |
| <i>dgcN</i> -HAMP-XhoI-rev        | 5`-GCCCTCGAGTTAGTATTTGAAATTATCGCCATC-3`            |
| <i>dgcN</i> -GGDEF-NotI-for       | 5`-GAAGCGGCCGCTGAGTGGCAGCTTCGTTTACAG-3`            |
| <i>dgcO</i> -GS-XhoI-rev          | 5`-GCCCTCGAGTATGTTATGGCCCCACGTATCGTT-3`            |
| <i>dgcO</i> -GGDEF-NotI-for       | 5`-GAAGCGGCCGCTAACAGAAGTCTGCGGGTGAAA-3`            |
| <i>dgcP</i> -GGDEF-pBT-EcoRI-for  | 5`-GCCGAATTC CATTGCGCAATCGTATACCGAC-3`             |
| <i>dgcP</i> -GGDEF-               | 5`-GCCGAATTC CCATTGCGCAATCGTATACCGAC-3`            |

|                                   |                                              |
|-----------------------------------|----------------------------------------------|
| pTRG-EcoRI-for                    |                                              |
| <i>dgcZ</i> -GGDEF-pBT-EcoRI-for  | 5'-GCCGAATTCCTGAATCTTTATTTAATGTTG-3'         |
| <i>dgcZ</i> -GGDEF-pTRG-EcoRI-for | 5'-GCCGAATTCCTGAATCTTTATTTAATGTTG-3'         |
| <i>pdeA</i> -GGDEF-XhoI-rev       | 5'-GCCCTCGAGTTAATTGTTCCAGTGAATTTGCCG-3'      |
| <i>pdeF</i> -GGDEF-XhoI-rev       | 5'-GCCCTCGAGTTATAGTCGATTCATCGCGACTTT-3'      |
| <i>pdeK</i> -GGDEF-XhoI-rev       | 5'-GCCCTCGAGTCAGTCCCAACTGCCATCCGG-3'         |
| <i>pdeO</i> -GGDEF-NotI-for       | 5'-TTTGCGGCCGCATCTCCCGTGGTGTATCTCATC-3'      |
| <i>pdeO</i> -GGDEF-XhoI-rev       | 5'-GCCCTCGAGTTACTCTTTTACCATTTCGTT-3'         |
| <i>pdeR</i> -PAS-XhoI-rev         | 5'-GCTACTCGAGGTGATCGATTAATCCTGC-3'           |
| <i>pdeR</i> -GGDEF-pTRG-EcoRI-for | 5'-GCCGAATTCAGCGCAATAACCGTGTATTTTTTCG-3'     |
| <i>pdeR</i> -GGDEF-XhoI-rev       | 5'-GCTACTCGAGCCAGGTGATTTTCGGTTGATAGTGAATA-3' |
| <i>pdeR</i> -EAL-pTRG-EcoRI-for   | 5'-GCCGAATTCAGCGTCACGCCGACACAGCAATG-3'       |
| <i>csrD</i> -GGDEF-XhoI-rev       | 5'-GCCCTCGAGTTAACGCCAGCGAACATTACCGCG-3'      |
| pBT-test-for                      | 5'-TCCGTTGTGGGGAAAGTTATC-3'                  |
| pBT-test-rev                      | 5'-GGGTAGCCAGCAGCATCC-3'                     |
| pTRG-test-for                     | 5'-TGGCTGAACAACCTGGAAGCT-3'                  |
| pTRG-test-rev                     | 5'-AATCGTCGCCCCCATAA-3'                      |

## II. Primers used for C-terminal 3xFLAG-tagging:

|                           |                                                                               |
|---------------------------|-------------------------------------------------------------------------------|
| <i>bluF</i> -d-H1P1(FLAG) | 5'-TTGAATGGTATCCCTTCCATAGCGTGGCCAGAGAAAAA<br>GACTACAAAGACCATGACGG-3'          |
| <i>bluF</i> -u-H2P2(FLAG) | 5'-ATGATTTACTGAAATCATGTGAAAGAATGTGCTGAAAATTA<br>CCTTAGTTCCTATTCCGAAGTTC-3'    |
| <i>cdgI</i> -d-H1P1(FLAG) | 5'-GAAAAGCGAGGGGGCAACAAAGTGATTATTCATCATATT<br>GACTACAAAGACCATGACGG-3'         |
| <i>cdgI</i> -u-H2P2(FLAG) | 5'-AAAAGCCACGCAAAAAGCATGGCTCTGAATATTTTTGCACTTA<br>CATATGAATATCCTCCTTAG-3'     |
| <i>csrD</i> -d-H1P1(FLAG) | 5'-TGATACTAACGTGAAAAATATTCACAAAGATACTCGGTT<br>GACTACAAAGACCATGACGG-3'         |
| <i>csrD</i> -u-H2P2(FLAG) | 5'-CGCATTATTCTACGTGAAAACGGATTAACGGCAGGTTA<br>CCTTAGTTCCTATTCCGAAGTTC-3'       |
| <i>dgcC</i> -d-H1P1(FLAG) | 5'-AGCAAAGAAAGCCGGACGTAACCGCACCGAAGTGGCGGCC<br>GACTACAAAGACCATGACGG-3'        |
| <i>dgcC</i> -u-H2P2(FLAG) | 5'-GAAAACTCAGCAAATCCTGATGACTTTGCGCCGACGTCA<br>CCTTAGTTCCTATTCCGAAGTTC-3'      |
| <i>dgcE</i> -d-H1P1(FLAG) | 5'-GCTGGATTTGCTGGTGAATAGTAGTTATTTGCGGATTAAC<br>GACTACAAAGACCATGACGG-3'        |
| <i>dgcE</i> -u-H2P2(FLAG) | 5'-CGCGTTAGCGTCGCATCAGGCGATGGGGAAGCACGCCTCA<br>CCTTAGTTCCTATTCCGAAGTTC-3'     |
| <i>dgcF</i> -d-H1P1(FLAG) | 5'-CAACCGTACCAGCACTATGCGTTACGGTGAGGAAGTTGTC<br>GACTACAAAGACCATGACGG-3'        |
| <i>dgcF</i> -u-H2P2(FLAG) | 5'-CACATTGCATTCAAATCGCGCGTAATGAATAAAGATGTCA<br>CATATGAATATCCTCCTTAG-3'        |
| <i>dgcI</i> -d-H1P1(FLAG) | 5'-CAGAAACCCATGCCATTCTCCGCTGGGATAAAAGTGAAAATTA<br>GACTACAAAGACCATGACGG-3'     |
| <i>dgcI</i> -u-H2P2(FLAG) | 5'-GTACGAACTTATTGATTCTGGACATACGTAAACTACTCTTTTAC<br>CCTTAGTTCCTATTCCGAAGTTC-3' |
| <i>dgcJ</i> -d-H1P1(FLAG) | 5'-GATGAGCGTTTATATGTCAATAAGCAGAACAAAAACAGCCGTTCA                              |

|                           |                                                                                  |
|---------------------------|----------------------------------------------------------------------------------|
|                           | GACTACAAAGACCATGACGG-3'                                                          |
| <i>dgcJ</i> -u-H2P2(FLAG) | 5'-CATTTACGCTCCTGAGATTACAAGCAAACAACACAGAAGGTTA<br>TCACCTTAGTTCCTATTCCGAAGTTC-3'  |
| <i>dgcM</i> -d-H1P1(FLAG) | 5'-TCGGGCGAAAAATGATGGACGCAACCGCGTGCTGGCGGCA<br>GACTACAAAGACCATGACGG-3'           |
| <i>dgcM</i> -u-H2P2(FLAG) | 5'-CTAAGCGCAGTCGTTGATCTCGAGACGCATCCGCGGCTTA<br>CCTTAGTTCCTATTCCGAAGTTC-3'        |
| <i>dgcN</i> -d-H1P1(FLAG) | 5'-ATATGTATCAGGCCAACACCAGCGTGCCGAAAAGCTGGTGAGA<br>GACTACAAAGACCATGACGG-3'        |
| <i>dgcN</i> -u-H2P2(FLAG) | 5'-GGGGTGCTACCAGGTGCTTATCATATCGATATATCCTTGTTA<br>CCTTAGTTCCTATTCCGAAGTTC-3'      |
| <i>dgcO</i> -d-H1P1(FLAG) | 5'-ACGAGGTAGAAACCGTGTTGAACTCTGGAAAGCCAGTCTT<br>GACTACAAAGACCATGACGG-3'           |
| <i>dgcO</i> -u-H2P2(FLAG) | 5'-CGGTTAGCTTCATGATTACCTCTGCATCCTGGCGCATCTA<br>CCTTAGTTCCTATTCCGAAGTTC-3'        |
| <i>dgcP</i> -d-H1P1(FLAG) | 5'-ACAGAAAACACCTTTTGTGCGCATCCAGCGCTACATTCC<br>GACTACAAAGACCATGACGG-3'            |
| <i>dgcP</i> -u-H2P2(FLAG) | 5'-CGCATGTTATCACCAATCAAAGGATGTGAATACGCCTCA<br>CCTTAGTTCCTATTCCGAAGTTC-3'         |
| <i>dgcQ</i> -d-H1P1(FLAG) | 5'-TAAACAGGCTGGGCGTAATCGGGTATTTCGCGAGCGATAAC<br>GACTACAAAGACCATGACGG-3'          |
| <i>dgcQ</i> -u-H2P2(FLAG) | 5'-GGCGTGAAGGGCTGGACCATTTTTTCTCCGCCCGTTAAGC<br>CCTTAGTTCCTATTCCGAAGTTC-3'        |
| <i>dgcT</i> -d-H1P1(FLAG) | 5'-TAATAAGGTGGTTGTGAGGGATGTGGTGAATTTTTGTGAGTCACCA<br>GACTACAAAGACCATGACGG-3'     |
| <i>dgcT</i> -u-H2P2(FLAG) | 5'-GGCCTGTGTCCATATTACGTGGGTAGGATCAAATGCCGCTTA<br>CCTTAGTTCCTATTCCGAAGTTC-3'      |
| <i>dgcZ</i> -d-H1P1(FLAG) | 5'-AGCAAACCGGAAGAAATCGCTGCATGTTTATTGACGAACAAAAT<br>GTGGACTACAAAGACCATGACGG-3'    |
| <i>dgcZ</i> -u-H2P2(FLAG) | 5'-CATCAGTTTTCTCAATGAATGTTAAACGGAGCTTAAACTCGGTAAAT<br>CCTTAGTTCCTATTCCGAAGTTC-3' |
| <i>pdeA</i> -d-H1P1(FLAG) | 5'-GCAATATCTGCAAGGGTATTTGATTGGTCGCCCGCAGCCATTAGCT<br>GATGACTACAAAGACCATGACGG-3'  |
| <i>pdeA</i> -u-H2P2(FLAG) | 5'-AAGTTAGCGCTTATGGGATAATTCCCCGGTTTTTTTACGCCTGTTA<br>CCTTAGTTCCTATTCCGAAGTTC-3'  |
| <i>pdeB</i> -d-H1P1(FLAG) | 5'-GGCATTACCGAAAGAAGATTTCTTACGCTGGGCCGAGCAACATTTG<br>GACTACAAAGACCATGACGG-3'     |
| <i>pdeB</i> -u-H2P2(FLAG) | 5'-GGTAGCGTGACGGGCTGTGCGGCGTGCCGTCAGCCAAAATTC<br>CCTTAGTTCCTATTCCGAAGTTC-3'      |
| <i>pdeC</i> -d-H1P1(FLAG) | 5'-GCAATGGATGGAGCAATTACCCGCGCGGGAGTTAACGCGCGGG<br>CAAGACTACAAAGACCATGACGG-3'     |
| <i>pdeC</i> -u-H2P2(FLAG) | 5'-CAGTTTGATCGCACTCCCAGCGATTATCGCCACCGCCTGTAATTTTA<br>CCTTAGTTCCTATTCCGAAGTTC-3' |
| <i>pdeD</i> -d-H1P1(FLAG) | 5'-CCGGCATAATGGACATATCAGCCCATTATGCCGTTACGT<br>GACTACAAAGACCATGACGG-3'            |
| <i>pdeD</i> -u-H2P2(FLAG) | 5'-TAAAGAGCAACCGGCGCACGATGAAGATGAGTAAGCGTTA<br>CCTTAGTTCCTATTCCGAAGTTC-3'        |
| <i>pdeF</i> -d-H1P1(FLAG) | 5'-GTTAATTGATACGCTGAATGAAATCGAACCCATTTCGCGAAAGTGCC<br>GACTACAAAGACCATGACGG-3'    |
| <i>pdeF</i> -u-H2P2(FLAG) | 5'-TACTTTGCGGGCCGACGAGAAATGTGCGCCCGCATTATTCA<br>CCTTAGTTCCTATTCCGAAGTTC-3'       |
| <i>pdeG</i> -d-H1P1(FLAG) | 5'-AATTATCCTTTCTAAACCGAAGGTGAAGGTTGTGGTTGAG<br>GACTACAAAGACCATGACGGTG-3'         |
| <i>pdeG</i> -u-H2P2(FLAG) | 5'-TATAATTACACCGCACTATGGCCTTACTGATCAATTTTCA<br>CCTTAGTTCCTATTCCGAAGTTC-3'        |
| <i>pdeH</i> -d-H1P1(FLAG) | 5'-GGCACCGATAGAAACGCTGAATACGGCGGTTCTGGCGCTA<br>GACTACAAAGACCATGACGG-3'           |
| <i>pdeH</i> -u-H2P2(FLAG) | 5'-CCTAAAGATAGTCCAGCCAGGCGGAAAATGAGGCAGCTTA<br>CCTTAGTTCCTATTCCGAAGTTC-3'        |
| <i>pdeI</i> -d-H1P1(FLAG) | 5'-CAGAAACCCATGCCATTCTCCGCTGGGATAAAAGTGGAAAATTA                                  |

|                           |                                                                                            |
|---------------------------|--------------------------------------------------------------------------------------------|
|                           | GACTACAAAGACCATGACGG-3'                                                                    |
| <i>pdeI</i> -u-H2P2(FLAG) | 5'-GTACGAACTTATTGATTCTGGACATACGTAAACTACTCTTTTAC<br>CCTTAGTTCCTATTCCGAAGTCC-3'              |
| <i>pdeK</i> -d-H1P1(FLAG) | 5'-CCCTATTGAAATCTTCGAAGAGAGTTACCTGGAAGAAAAG<br>GACTACAAAGACCATGACGG-3'                     |
| <i>pdeK</i> -u-H2P2(FLAG) | 5'-CAGCACTTTTTAAAGTTTTGTAATCAGTTTGGGGTAGCTA<br>CCTTAGTTCCTATTCCGAAGTCC-3'                  |
| <i>pdeL</i> -d-H1P1(FLAG) | 5'-TAATAAATTTATCTCTGAATGGGTAATGAAAGCAGGTGGT<br>GACTACAAAGACCATGACGG-3'                     |
| <i>pdeL</i> -u-H2P2(FLAG) | 5'-CCAACCTCCCGATGCGCTGTGAATAGCGGTTTACATCA<br>CATATGAATATCCTCCTTAG-3'                       |
| <i>pdeN</i> -d-H1P1(FLAG) | 5'-TTACCGCTGGACGATTTTGTTCGCTGGCTAAAGAAACCGTATACG<br>GACTACAAAGACCATGACGG-3'                |
| <i>pdeN</i> -u-H2P2(FLAG) | 5'-CCGGCATGCTTTCCTACTATGAATAATAAGGGACGTAAGCACACCTTA<br>CCACTGCGGCCTTAGTTCCTATTCCGAAGTCC-3' |
| <i>pdeO</i> -d-H1P1(FLAG) | 5'-AATTCCAGGCTGGATGAGCAGCGTGTACCCTGAAAATC<br>GACTACAAAGACCATGACGG-3'                       |
| <i>pdeO</i> -u-H2P2(FLAG) | 5'-TAAATGAAAACCCGCGAGTGC GGCGAGAGGAATTTGTCA<br>CCTTAGTTCCTATTCCGAAGTCC-3'                  |
| <i>rflP</i> -d-H1P1(FLAG) | 5'-GCCTGCCGTTCCCATAAATCAGATAACGACGTTGGTTCAG<br>GACTACAAAGACCATGACGG-3'                     |
| <i>rflP</i> -u-H2P2(FLAG) | 5'-GTTACTCTCGTCTTAAACACCAGCAAACAGAAGGGTTATCG<br>CCTTAGTTCCTATTCCGAAGTCC-3'                 |

### III. Primers used for cloning *pdeH-3xFLAG* and *pdeL-3xFLAG* into pCAB18:

|                                   |                                                     |
|-----------------------------------|-----------------------------------------------------|
| <i>pdeH</i> -EcoRI-for            | 5'-GGCCCGGAATTC AAGGAGGACTGAGATGATAAGGCAGGTTATCC-3' |
| Flag-HindIII-rev                  | 5'-GGCGCCGAAGCTTCTATTTATCGTCGTCATCTTTG -3'          |
| <i>pdeL</i> -d-(-55) <i>Xma</i> I | 5'-GGAATCCCCGGGTAATCACTCATACTGAAC                   |
| <i>pdeL</i> -u-1413               | 5'-GCACGGGCAGGAGTCAATTCTGGTG-3'                     |

### IV. Primers used for cloning the cytoplasmic domain of CdgI on pQE30-Xa:

|                               |                                          |
|-------------------------------|------------------------------------------|
| <i>yeal</i> -960-forward-SacI | 5'-CAGGAGCTCCA ACTCTCCAGC-3'             |
| <i>yeal</i> -reverse-XmaI     | 5'-GATCCCGGGTTAAATATGATGAATAATCACTTTG-3' |

### V. Primers used for generating chromosomal knockout mutations by one-step inactivation:

|                                    |                                                                              |
|------------------------------------|------------------------------------------------------------------------------|
| <i>pdeL</i> -d-(-552)- <i>H1P1</i> | 5'-GAATGGATTTCAGTCTTAATGAGTGGTTTTTAAGGGACAGGCATAGGT<br>GTAGGCTGGAGCTGCTTC-3' |
| <i>pdeL</i> -u-1116- <i>H2P2</i>   | 5'-CCGATGCGCTGTGAATAGCGGTTTACATCAACCACCTGCTTTCATCAT<br>ATGAATATCCTCCTTAG-3'  |
